# Supplementary material
Source: Springer Nature journal article supplement (https://www.springermedizin.de/resource/supplementary/12967_2013_1724_MOESM1_ESM.pdf/9575150)

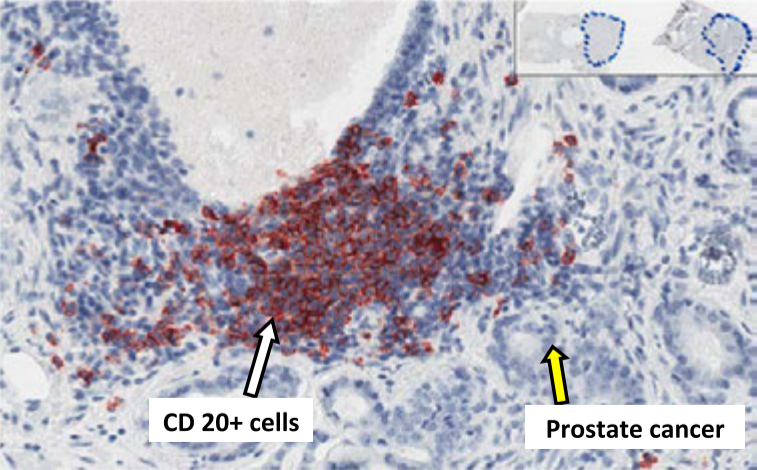

**CD 20+ cells**

**Prostate cancer**

Supplement: MOESM1 [file 9575150]
